# Supplementary material for: Global detection of DNA repair outcomes induced by CRISPR–Cas9
Source: PubMed Central journal article supplement — Nucleic Acids Res. 2021 Aug 7;49(15):8732–42. doi: 10.1093/nar/gkab686 (PMC8421148; doi:10.1093/nar/gkab686), 2021-08-07
Supplement: gkab686_supplemental_file.pdf [file gkab686_supplemental_file.pdf]

# Supplementary Materials for

## Global detection of DNA repair outcomes induced by CRISPR-Cas9

Mengzhu Liu<sup>1,3</sup>, Weiwei Zhang<sup>1,3</sup>, Changchang Xin<sup>1,3</sup>, Jianhang Yin<sup>1</sup>, Yafang Shang<sup>2</sup>, Chen Ai<sup>1</sup>, Jiabin Li<sup>1</sup>, Fei-long Meng<sup>2</sup>, Jiazhi Hu<sup>1,\*</sup>

### **This PDF file includes:**

**Supplementary Figure S1** Analyzing repair outcomes by PEM-Q

**Supplementary Figure S2** Repair outcomes at *c-Myc* and *Bcr* loci

**Supplementary Figure S3** Microhomologies are commonly used in large deletions

**Supplementary Figure S4** Insertions at the target sites

**Supplementary Figure S5** Translocations enriched at recurrent DSBs in the genome

**Supplementary Figure S6** Editing events detected by primers with different distances from the cut-site

**Supplementary Table S1** Primer sequences for PEM-seq and 3C-HTGTS

**Supplementary Table S2** sgRNA sequences for PEM-seq

**Supplementary Table S3** Detected 45 plasmid integrations sequences at the *c-Myc* locus in CH12F3 cells.

**Supplementary Table S4** Comparison of PEM-Q with other *in silico* methods analyzing CRISPR-Cas9 editing repair outcomes

**Supplementary Table S5** Editing events and editing efficiency detected by PEM-Q

# Supplementary Figure S1

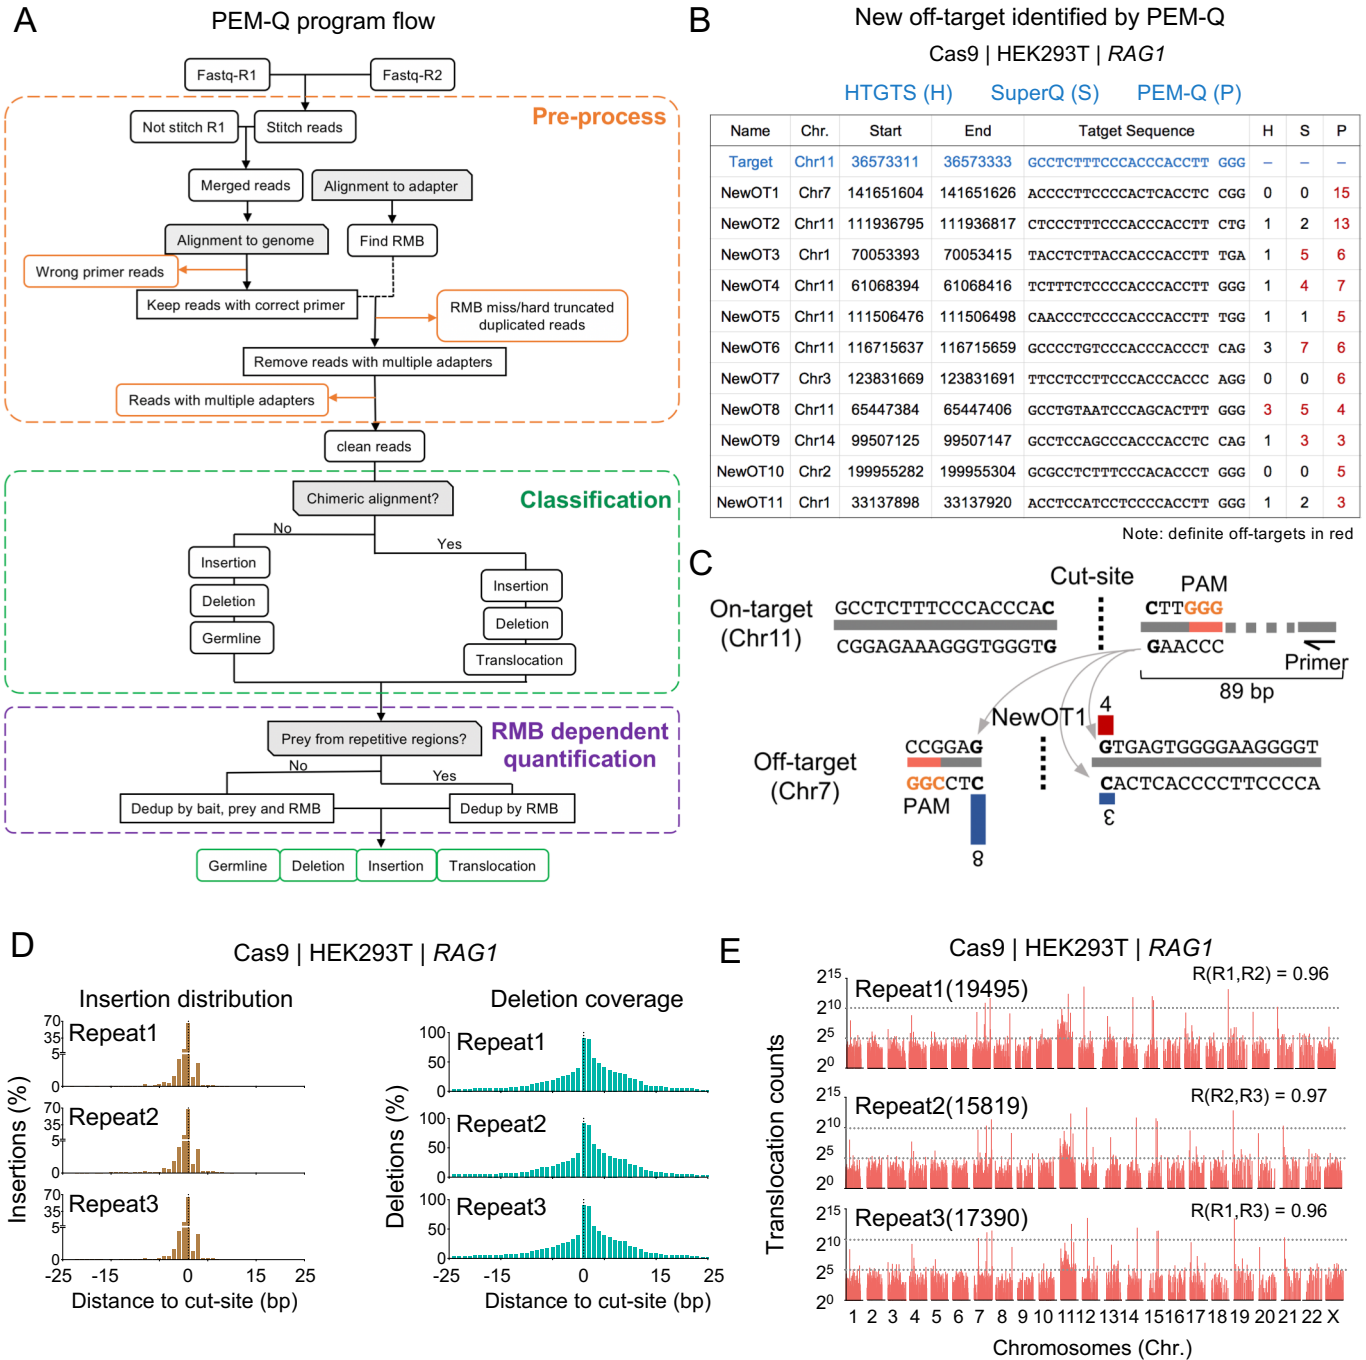

**Supplementary Figure S1. Analyzing repair outcomes by PEM-Q.** (A) PEM-Q pipeline flow diagram. (B) 11 New off-targets (NewOT) identified by PEM-Q at the *RAG1* locus in HEK293T cells. Translocation junctions on NewOTs detected by HTGTS (H), SuperQ (S) and PEM-Q (P) are listed in the table. The target locus is highlighted in blue. Off-targets consistent with the frequently-used criteria (see methods for details) are highlighted in red. (C) Schematic diagram showing the distribution of translocation junctions at NewOT1. PAM sequences are highlighted in orange and bases at cut-site are in bold. Primer is 89 bp downstream from cut-site as shown by a black arrow. Positive-strand translocation junctions are in red, while negative-strand in blue. (D) Distribution of insertions among total insertions and coverage of deletions among total deletions for three repeat PEM-seq libraries at the *RAG1* locus in HEK293T cells. (E) Genome-wide translocations of three repeat PEM-seq libraries at *RAG1* locus in HEK293T cells. Translocation junctions are plotted with 2-Mb intervals on a log scale. Total numbers (n) of translocations are shown. Pearson correlation (R) between each other repeat was 0.96-0.97.

# Supplementary Figure S2

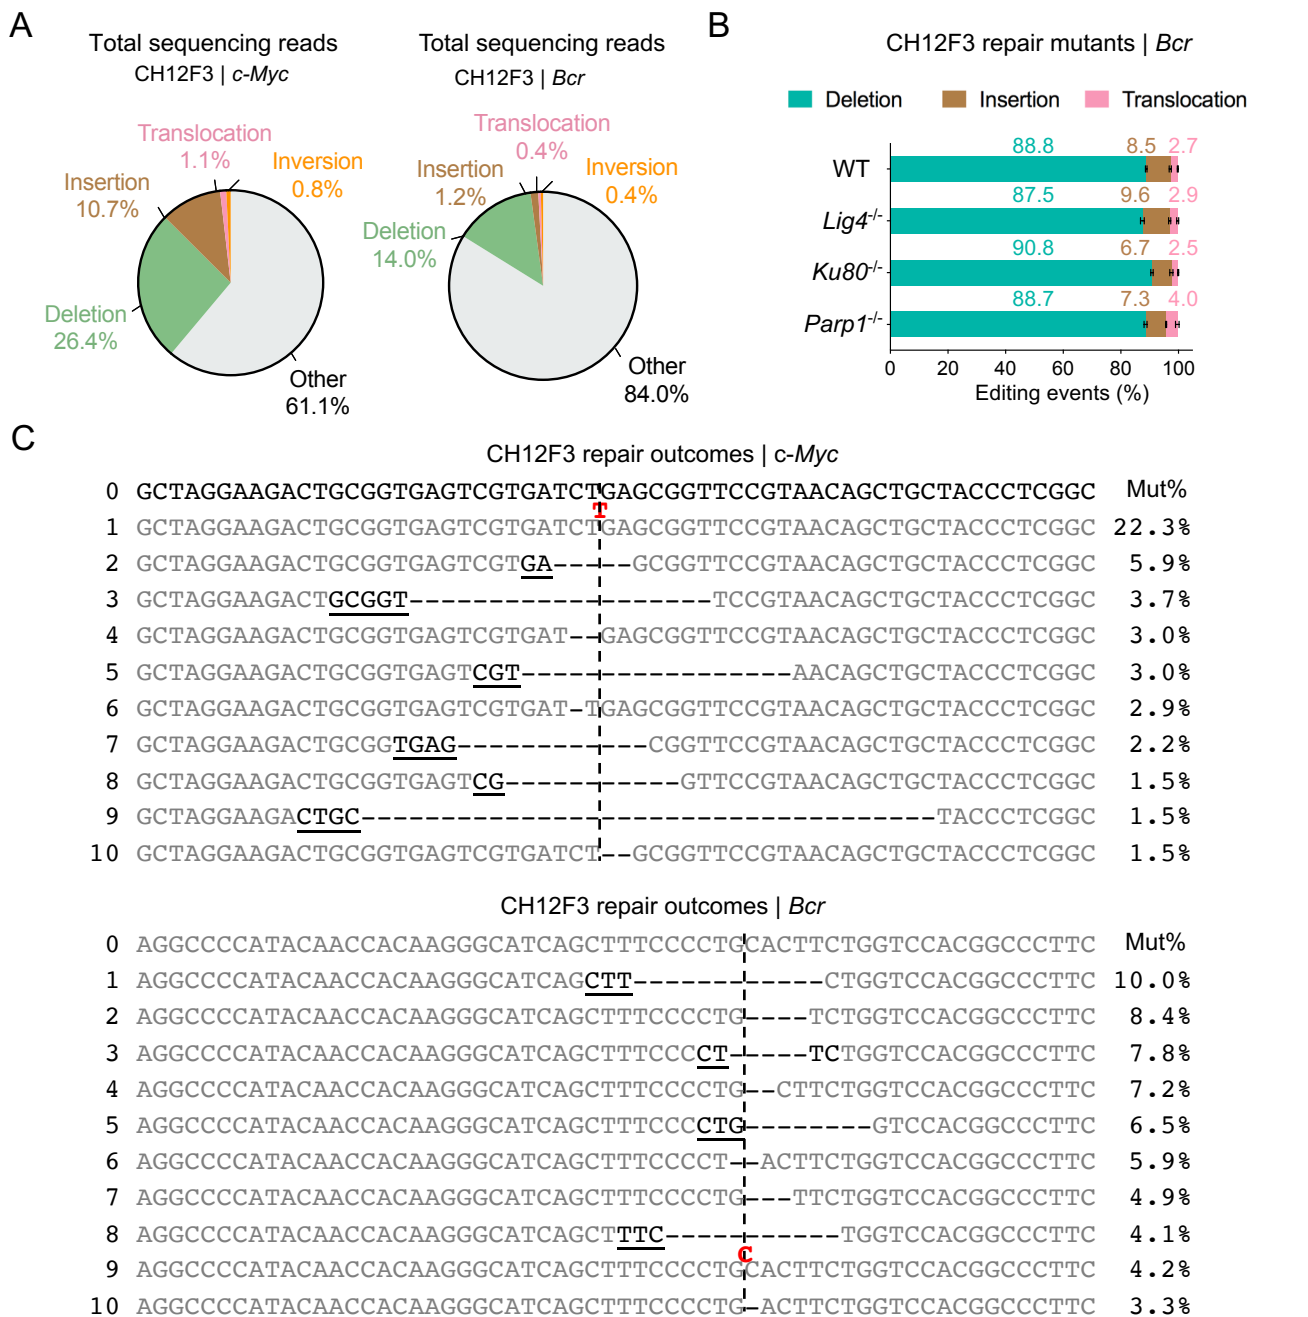

**Supplementary Figure S2. Repair outcomes at *c-Myc* and *Bcr* loci.** (A) Pie chart of total sequencing reads at the *c-Myc* (left), *Bcr* (right) loci in CH12F3 cells. Total sequencing reads include deletion, insertion, translocation, inversion, and other reads (including germline sequences). The average percentages of three repeats are shown. (B) Bar charts showing percentages of deletion (cyan), insertion (brown) and translocation (pink), the *Bcr* locus in CH12F3 cells with indicated backgrounds. Error bars, mean  $\pm$  SD. (C) Top 10 most frequent mutation sequences at the *c-Myc* (top) and *Bcr* (bottom) loci in CH12F3 cells. #0 in the top indicate the target sequences. The horizontal dashed line represent deleted bases and the vertical dashed line marks the cut-site. Bases with underline represents the microhomology, the base of insertion is shown in red. The average mutation frequency (Mut%) of three repeats among all editing events are listed on the right side.

# Supplementary Figure S3

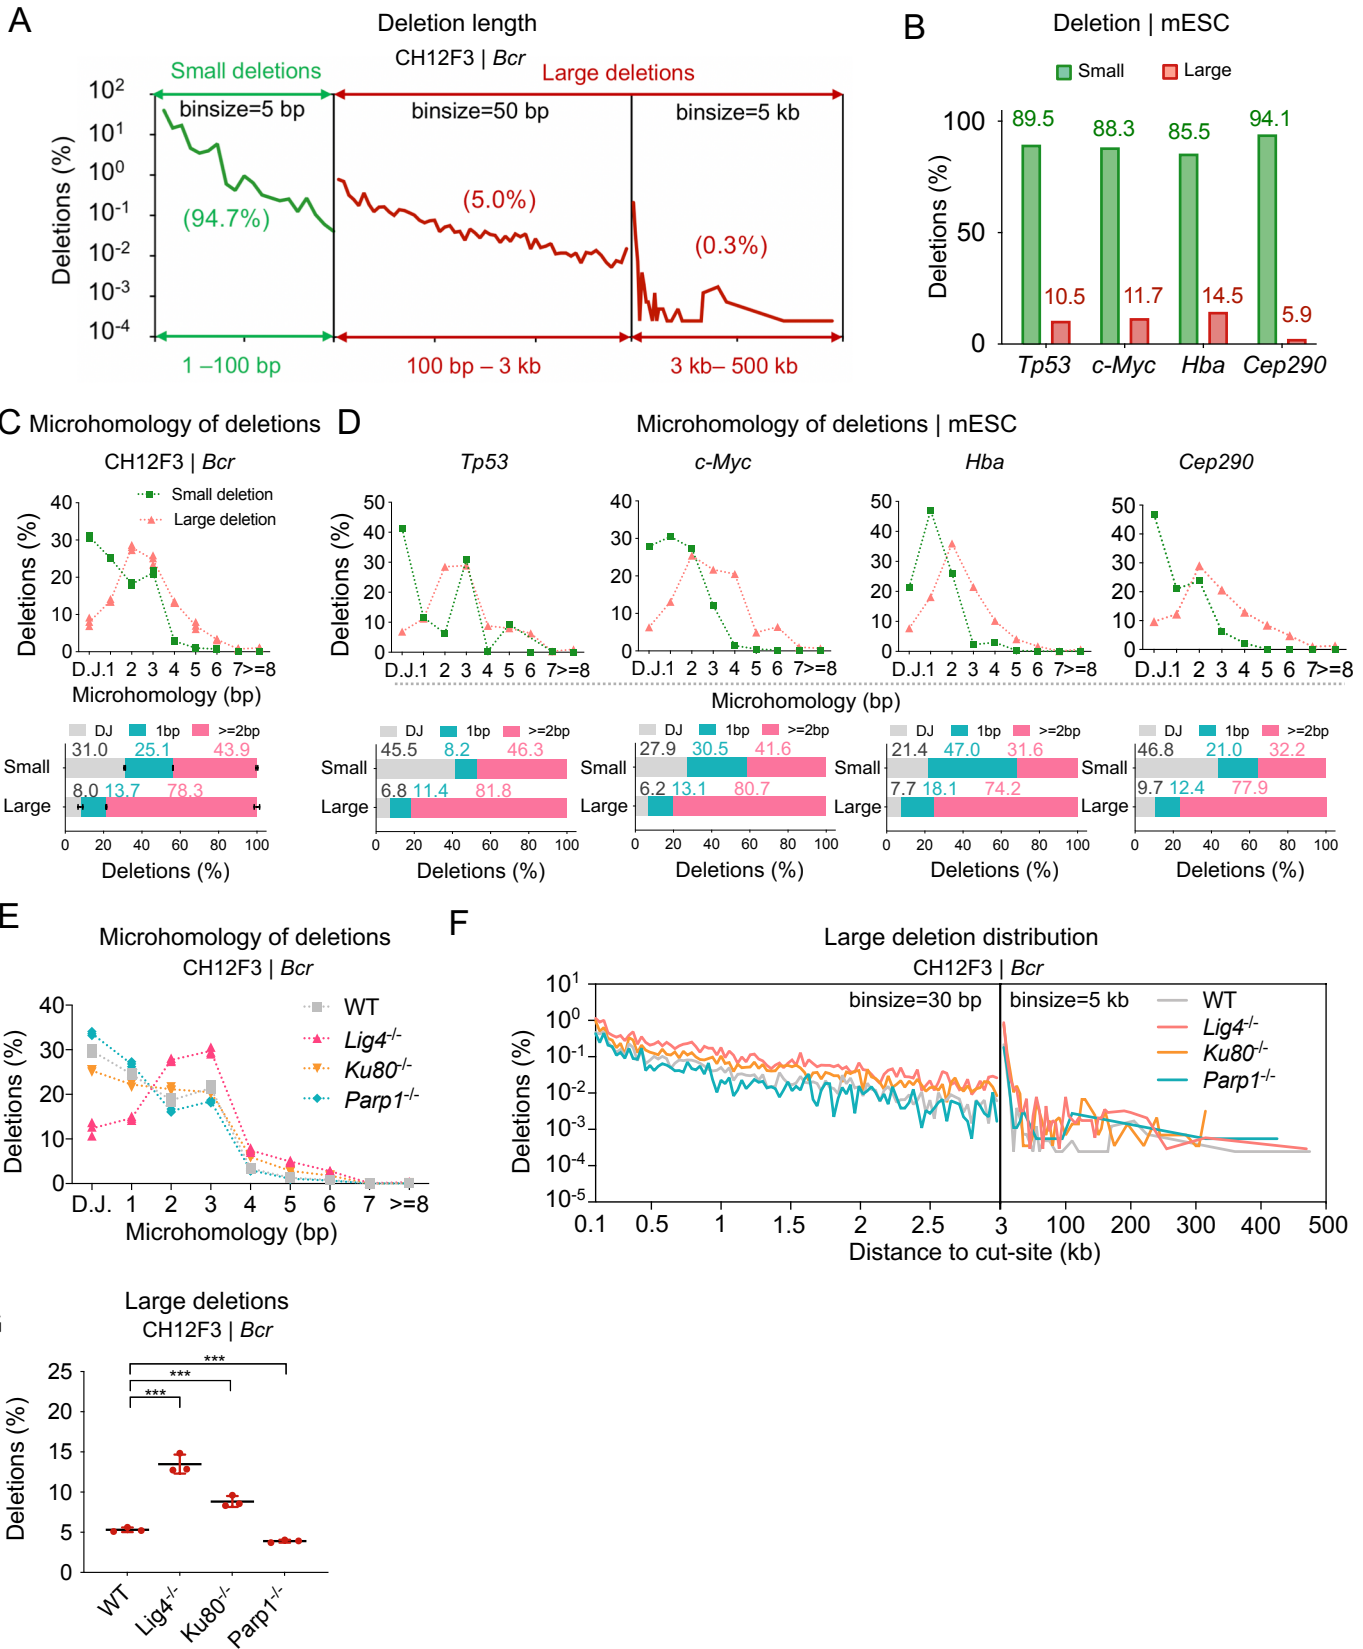

**Supplementary Figure S3. Microhomologies are commonly used in large deletions.** (A) The distribution pattern of deletions at the *Bcr* locus in CH12F3 cells. Total junctions of three repeats are plotted on a log scale. Percentages of deletions within each region are shown in the brackets. Please note that 5 bp, 50 bp, and 5 kb bin-sizes are used for the three regions, respectively. (B) Percentages of small and large deletions among the total deletions at indicated loci in mESCs. (C and D) Line plot (top) and bar chart (bottom) of microhomologies with indicated length in small or large deletions at the *Bcr* locus in CH12F3 cells (C) at indicated loci in mESCs (D). D.J., direct joining. Error bars, mean  $\pm$  SD. (E) Line plot of microhomologies with indicated length in total deletions at the *Bcr* locus in CH12F3 cells with indicated backgrounds. (F) The distribution patterns of large deletions at the *Bcr* locus in CH12F3 cells with indicated backgrounds. Please note that 30 bp and 5 kb bin-sizes are used for two regions, respectively. (G) Percentages of large deletions among total deletions at the *Bcr* locus in CH12F3 cells with indicated backgrounds. One-tailed t-test, \*\*\*,  $p < 0.0005$ . Error bars, mean  $\pm$  SD.

# Supplementary Figure S4

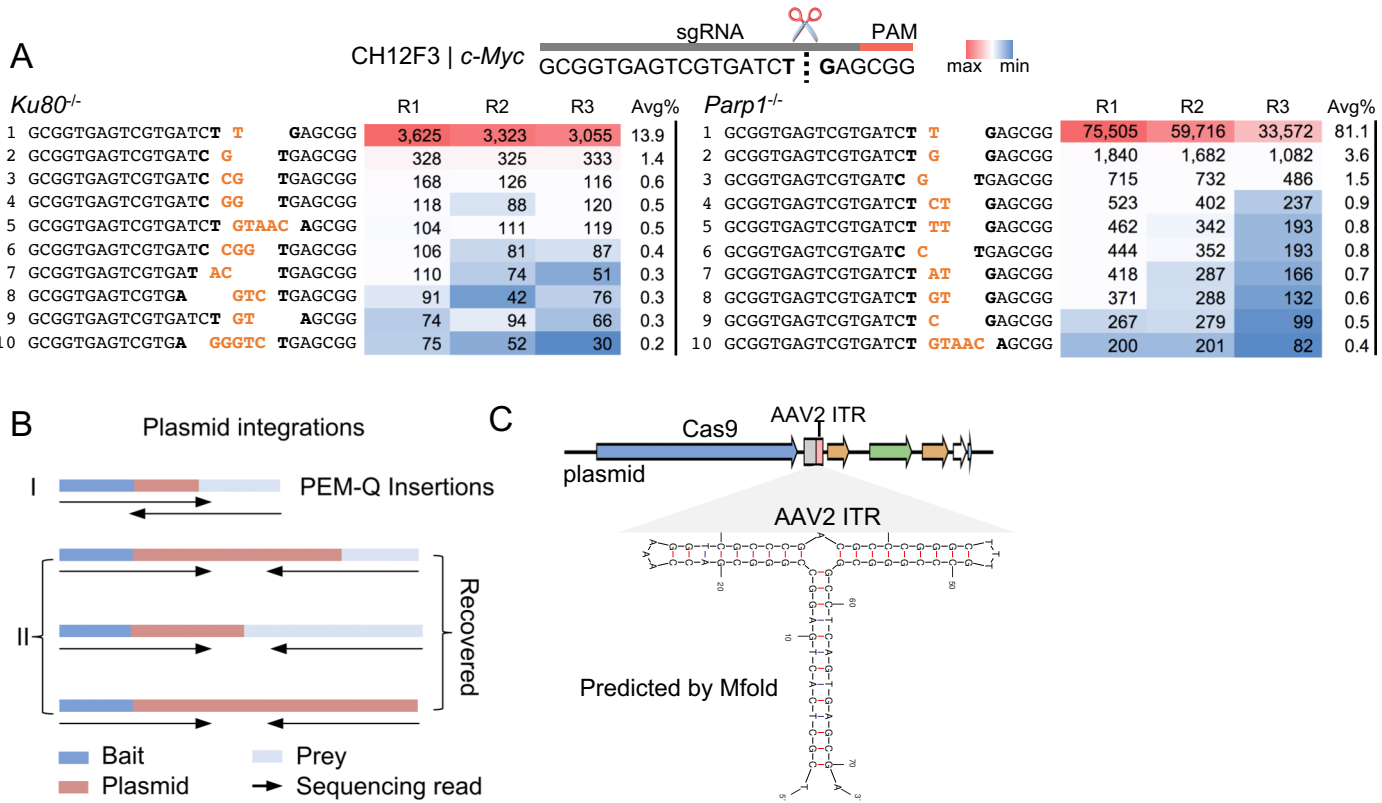

**Supplementary Figure S4. Insertions at the target sites.** (A) Top 10 most frequent insertions at the *c-Myc* locus in *Ku80*<sup>-/-</sup> and *Parp1*<sup>-/-</sup> CH12F3 cells. The target site is shown on the top. Bases at cleavage site are in bold and inserted bases are in orange. The numbers from three repeats (R1, R2, R3) and average percentages (Avg%) of each type insertions among the total insertion are listed in the table, filled with gradient color from the maximum (red) to the minimum (blue) frequencies. (B) Schematics showing the two types of plasmid integrations. The sequencing reads cover the entire inserted fragments in Structure I, while only partially cover the inserted fragment in Structure II. (C) Predicted secondary structure of AAV2 ITR from plasmid predicted by Mfold (<http://www.unafold.org/mfold/applications/dna-folding-form.php>).

# Supplementary Figure S5

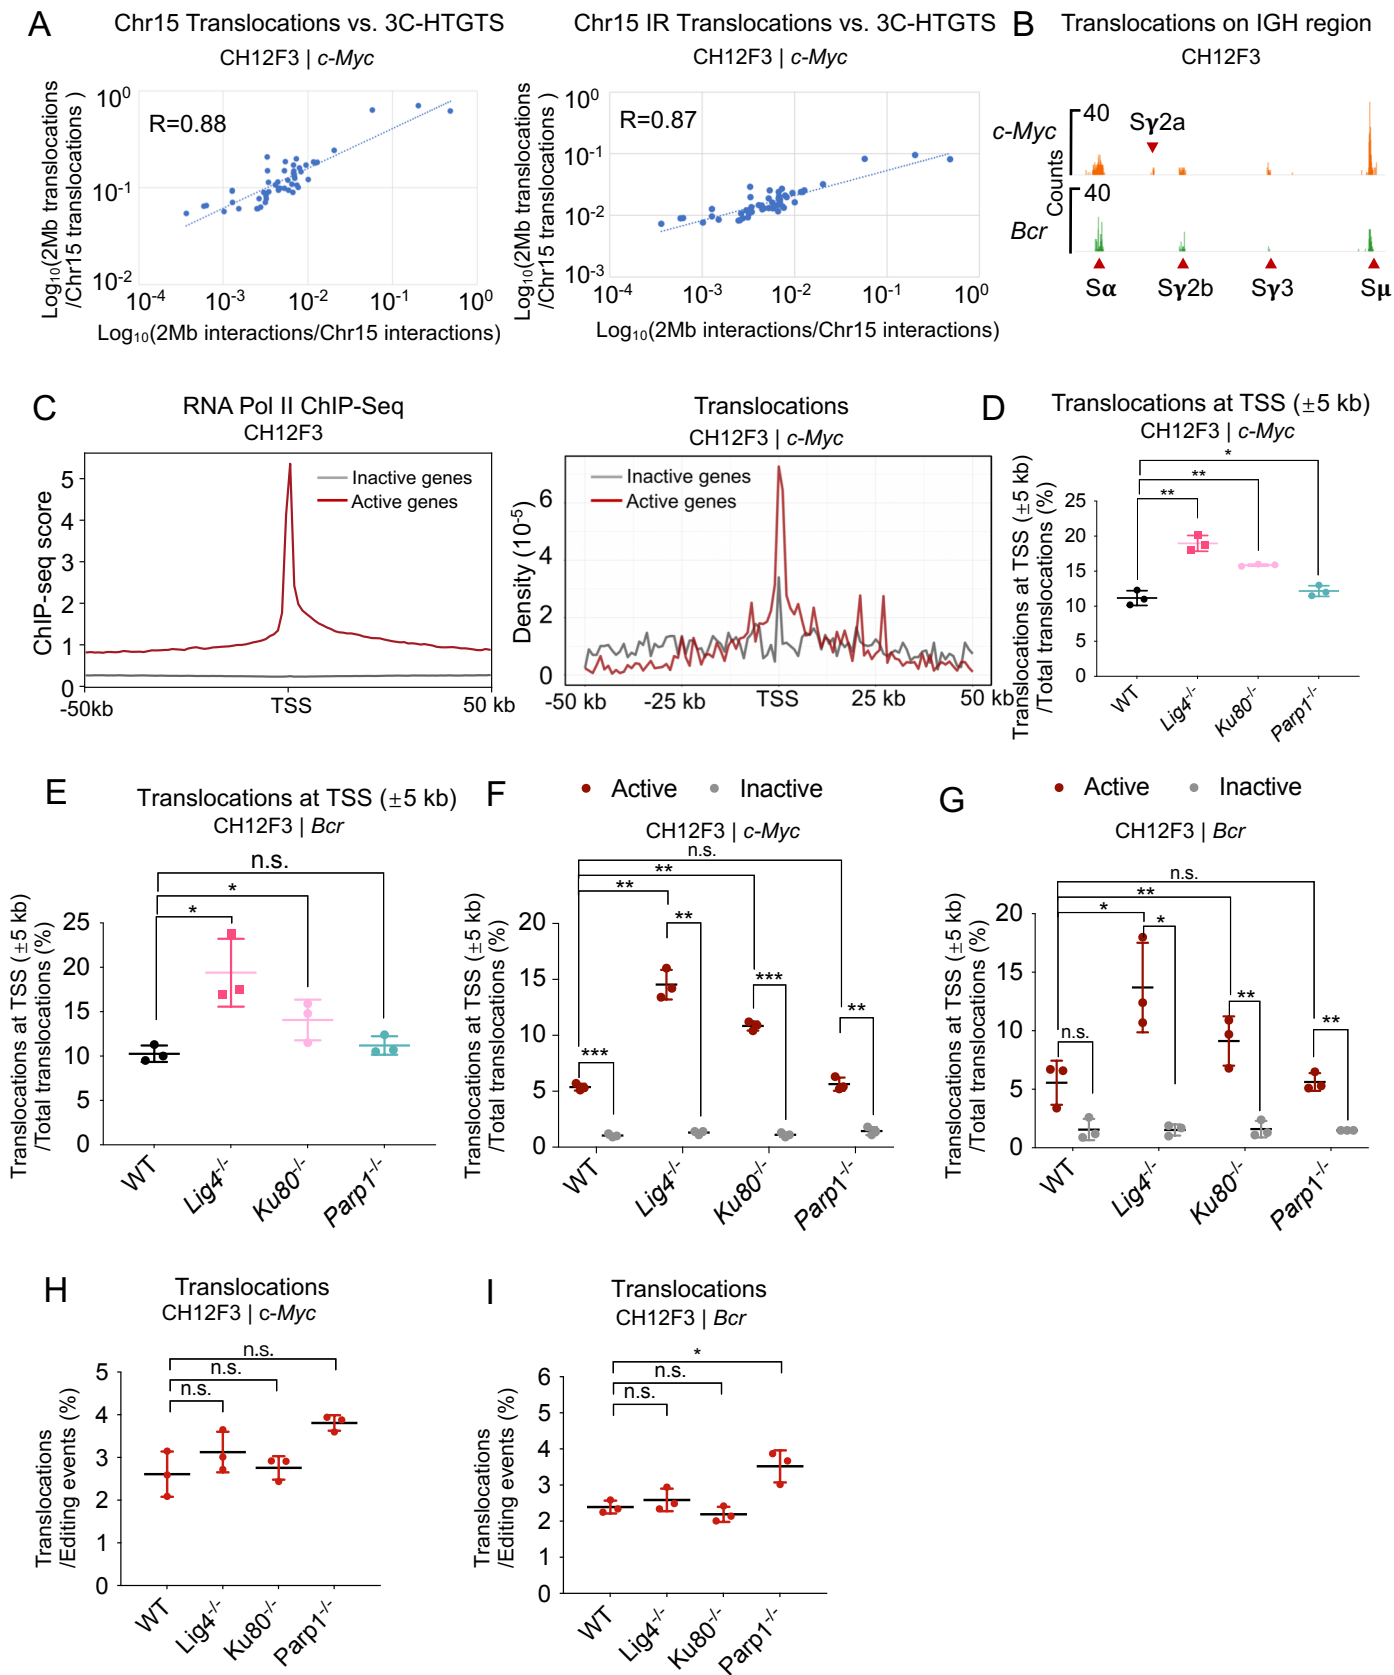

**Supplementary Figure S5. Translocations enriched at recurrent DSBs in the genome.** (A) Correlation of junctions on Chr15 between 3C-HTGTS and PEM-seq without (left) or with (right) IR. Each dot represents translocation frequency versus 3C-HTGTS interaction frequency in each 2 Mb bin along Chr15. Pearson correlation (R) is shown. (B) The distribution of translocation junctions in the S region. The positions of junction-enriched S regions are indicated by red triangles. (C) The distribution of RNA Pol II ChIP-seq signals (left) and translocation junctions (right) around TSSs ( $\pm 50$ kb, 1kb bins). Genes were sorted by means of RNA Pol II signal at TSS ( $\pm 5$ kb), top 25% genes were grouped into active genes, while bottom 25% genes were grouped into inactive genes. Translocations around active genes' TSSs and inactive genes' TSSs are plotted in the corresponding color. (2 kb bins). For note, translocations distributed on the *IgH* region were removed. (D and E) The percentages of translocation junctions around TSSs ( $\pm 5$ kb) at the *c-Myc* (D) and *Bcr* (E) loci in CH12F3 cells. (F and G) The percentages of translocation junctions around active and inactive genes' TSSs ( $\pm 5$ kb) at the *c-Myc* (F) and *Bcr* (G) loci in CH12F3 cells. (H and I) Percentages of translocations among editing events at the *c-Myc* (H) and *Bcr* (I) loci in CH12F3 cells. One-tailed t-test, \*,  $p < 0.05$ , \*\*,  $p < 0.005$ , \*\*\*,  $p < 0.0005$ ; n.s., not significant. Error bars, mean  $\pm$  SD.



## Supplementary Figure S6

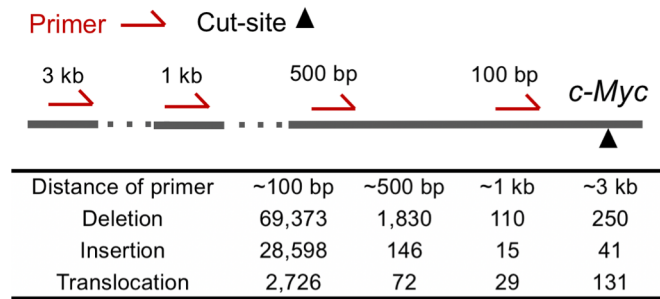

**Supplementary Figure S6. Editing events detected by primers with different distances from the cut-site.** Numbers of deletions, insertions and translocations captured by primers with distances of 100 bp, 500 bp, 1 kb, and 3 kb are listed in the table. For note, the numbers were normalized by total deduped sequencing reads. The black triangle indicates the cut-site. The red arrows represents primers.

### Supplementary Table S1 Primer sequences for PEM-seq and 3C-HTGTS

| Cell line | Locus                     | Bio primer                         | Red primer                     |
|-----------|---------------------------|------------------------------------|--------------------------------|
| mESCs     | <i>Tp53</i>               | GAGGCTATCCGGAGCTAAGAG<br>TCGCTC    | GTCGGGCAAGTCTCGCTGAG           |
|           | <i>c-Myc</i>              | CTGACAGCCTGGGACCGACAC<br>GGAG      | GCGGCGATCGCAACCCGTCC           |
|           | <i>Hba</i>                | CCCTAGGAAGGGCTTGGGGGT<br>CC        | AGAGGCATCAGGGTGTCCAC           |
|           | <i>Cep290</i>             | GTATTCTAGATTAGCCAATAAT<br>CAGATGG  | GACAGTAGCATACCTGGTAATG         |
| CH12F3    | <i>c-Myc</i><br>(~100 bp) | CGGCACTAGGACTTGATGTTG<br>GGCTAGCGC | GGAAACCAGAGGGAATCCTC           |
|           | <i>c-Myc</i><br>(~500 bp) | AGGTTACTATGGGCTGACGCT<br>GACCCGGCC | GATATGTGTCCTTTGAGGGGTC<br>AAAC |
|           | <i>c-Myc</i><br>(~1 kb)   | GCTCTGGAGTGAGAGGGGCTT<br>TGCTCCG   | GCGACTGACCCAACATCAGCGG<br>CCGC |
|           | <i>c-Myc</i><br>(~3 kb)   | GCCTTGGGGCGAGGAGTCCG<br>GAATAAG    | GTGTAGGATAAGCAAATCCCGA<br>GGG  |
|           | <i>Bcr</i>                | CACTGACCACAGCTGTTCTTC<br>CCAGGGAG  | CAGGTTGCCCTTCTGAGGCTAC         |

### Supplementary Table S2 sgRNA sequences for PEM-seq

| Cell line | Locus         | sgRNA Sequence           |
|-----------|---------------|--------------------------|
| mESCs     | <i>Tp53</i>   | CGGAAGAGGAAAGCGGACTC CGG |
|           | <i>c-Myc</i>  | AGCCTGACCCCCGCGGCACT AGG |
|           | <i>Hba</i>    | TCCAGAGAGGCATGCACCGC GGG |
|           | <i>Cep290</i> | ATTAGTGTCAAGTACCCCAT AGG |
| CH12F3    | <i>c-Myc</i>  | GCGGTGAGTCGTGATCTGAG CGG |
|           | <i>Bcr</i>    | GCCGTGGACCAGAAGTGCAG GGG |

**Supplementary Table S3 Detected 45 plasmid integrations sequences at the *c-Myc* locus in CH12F3 cells.**

| No. | Bait                | Prey                 | Aligned Vector Sequence                                                                                                                                 |
|-----|---------------------|----------------------|---------------------------------------------------------------------------------------------------------------------------------------------------------|
| 1   | 61986728<br>(Chr15) | 61986731<br>(Chr15)  | TGTTTTAGAGCTAGAAATAGCAAGTTAAAATAAGGCTAGTTAGGT<br>AACAACTTACGTTACGTAACAGCTAGTTACGTAACGTA                                                                 |
| 2   | 61986729<br>(Chr15) | 61986731<br>(Chr15)  | GTTTTAGAGCTAGAAATAGCAAGTTAAAATAAGGCTAGTTACTTA<br>ACAGCTTACGTTACGTAACAGCTAGTTACGTAACGTA                                                                  |
| 3   | 61986729<br>(Chr15) | 61986731<br>(Chr15)  | GTTTTAGAGCTAGAAATAGCAAGTTAAAATAAGGCTAGTTACGTA<br>TCAGCTTACGTTACGTAACAGCTAGTTACGTAACGTA                                                                  |
| 4   | 61986717<br>(Chr15) | 61986732<br>(Chr15)  | TCTCCCCATCTCCCCCCTCCCCACCCCAATTTGTATTATTTA<br>TTTTTAATTATTTGTGCAGCGATGGGGGCGGGGGGGGGG                                                                   |
| 5   | 61986705<br>(Chr15) | 113260965<br>(Chr12) | TGGCGAGGCGGCGGCGGCGGCGGCCCTATAAA                                                                                                                        |
| 6   | 61986724<br>(Chr15) | 61986730<br>(Chr15)  | TGATCACCGACGAGTACAAGGTGCCAGCAAGAAATCAAGGTG<br>CTGGGCAACACCGACCGGCACAGC                                                                                  |
| 7   | 61986724<br>(Chr15) | 61986730<br>(Chr15)  | TGATCACCGACGAGTACAAGGTGCCAGCAAGAAATCAAGGTG<br>CTGGGCAACACCGACCGGCACAGC                                                                                  |
| 8   | 61986689<br>(Chr15) | 61986733<br>(Chr15)  | AATTATCAAGGACAAGGACTTCCTGGACAATGAGGAAAACGAGG<br>ACATTCTGGAAGATATCGTGCTGACCCTGACACTGTTTGAGGACA<br>GAGAGATGATCGAGGAACGGCTGTAATGCTTGTGTTGCTATTAA<br>AGCATT |
| 9   | 61986714<br>(Chr15) | 61986733<br>(Chr15)  | AATTATCAAGGACAAGGACTTCCTGGACAATGAGGAAAACGAGG<br>ACATTCTGGAAGATATCGTGCTGACCCTGACACTGTTTGAGGACA<br>GAGAGATGATCGAGGAACGGCTGAAA                             |
| 10  | 61986725<br>(Chr15) | 61986728<br>(Chr15)  | GGGCACAAGCCCGAGAACATCGTGATCGAAATGGCCAGAGAGA<br>ACCAGACCACCCAGAAGGGACAGA                                                                                 |
| 11  | 61986727<br>(Chr15) | 61986728<br>(Chr15)  | GCACAAGCCCGAGAACATCGTGATCGAAATGGCCAGAGAGAACC<br>AGACCACCCAGAAGGGACAGA                                                                                   |
| 12  | 61986723<br>(Chr15) | 61986737<br>(Chr15)  | ACATCGTGATCGAAATGGCCAGAGAGAACCAGACCACCCAGAAG<br>GGACAGAAGAACAGCCGCGAGAGAATGAAGCGGATCGAAGAGG<br>GCATCAAAG                                                |
| 13  | 61986723<br>(Chr15) | 61986737<br>(Chr15)  | ACATCGTGATCGAAATGGCCAGAGAGAACCAGACCACCCAGAAG<br>GGACAGAAGAACAGCCGCGAGAGAATGAAGCGGATCGAAGAGG<br>GGATCAAAG                                                |
| 14  | 61986723<br>(Chr15) | 61986737<br>(Chr15)  | ACATCGTGATCGAAATGGCCAGAGAGAACCAGACCACCCAGAAG<br>GGACAGAAGAACAGCCGCGAGAGAATGAAGCGGATCGAAGAGG<br>GCATCAAAG                                                |
| 15  | 61986724<br>(Chr15) | 61986727<br>(Chr15)  | AAGGGCCGGGATTTTGCCACCGTGCGGAAAGTGCTGAGCATGCC<br>CCAAGTGAATA                                                                                             |
| 16  | 61986728<br>(Chr15) | 61986731<br>(Chr15)  | CAAGCTGTGACCGTCTCCGGGAGCTGCATGTGTGAGAGGTTTTCA<br>CCGTCATCACCGATGAGT                                                                                     |
| 17  | 61986728<br>(Chr15) | 61986726<br>(Chr15)  | CAAGCTGTGACCGTCTCCGGGAGCTGCATGTGTGAGAGGTTTTCA<br>CCGTCATCACCGA                                                                                          |
| 18  | 61986728<br>(Chr15) | 61986726<br>(Chr15)  | CAAGCTGTGACCGTCTCCGGGAGCTGCATGTGTGAGAGGTTTTCA<br>CCGTCATCACCGA                                                                                          |
| 19  | 61986726<br>(Chr15) | 3142041<br>(Chr11)   | TTGGTTGAGTACTACCAGTACAGAAAAGCATCTTACGGATGGC<br>ATGACAGTAAGAGAATTATGCAGTGCTG                                                                             |
| 20  | 61986726<br>(Chr15) | 61986726<br>(Chr15)  | CGCTCGGCCCTCCGGCTGGCTGGTTTATTGCTGATAAATCTGGA<br>GCCGG                                                                                                   |
| 21  | 61986726<br>(Chr15) | 61986726<br>(Chr15)  | CGCTCGGCCCTCCGGCTGGCTGGTTTATTGCTGATAAATCTGGA<br>GCCGG                                                                                                   |
| 22  | 61986726<br>(Chr15) | 61986726<br>(Chr15)  | CGCTCGGCCCTCCGGCTGGCTGGTTTATTGCTGATAAATCTGGA<br>GCCGG                                                                                                   |
| 23  | 61986726<br>(Chr15) | 61986726<br>(Chr15)  | CGCTCGGCCCTCCGGCTGGCTGGTTTATTGCTGATAAATCTGCA<br>GCAGG                                                                                                   |
| 24  | 61986726<br>(Chr15) | 61986729<br>(Chr15)  | AGTAACAGCTCTGCTAATCCTGTTACCAGTGGCTGCTGCCAGTGG<br>CGATAAGTCGTGTCTTACCGGGTTGGACTCAAGACGAT                                                                 |

|    |                     |                     |                                                                                              |
|----|---------------------|---------------------|----------------------------------------------------------------------------------------------|
| 25 | 61986721<br>(Chr15) | 61986730<br>(Chr15) | GAAAAAAAAAGTAAAGGTGAGTTACCATCTTCGGCAACATCGTGG<br>ACGAGGTGGCCTACAAAGGTGAGTT                   |
| 26 | 61986721<br>(Chr15) | 61986730<br>(Chr15) | TAAAAAAAAAGTAAAGGTGAGTTACCATCTTCGGCAACATCGTGG<br>ACGAGGTGGCCTACAAAGGTGAGTT                   |
| 27 | 61986721<br>(Chr15) | 61986730<br>(Chr15) | TAAAAAACAGTAAAGGTGAGTTACCATCTTCGGCAACATCGTGG<br>ACGAGGTGGCCTACAAAGGTGAGTT                    |
| 28 | 61986717<br>(Chr15) | 61986730<br>(Chr15) | TAAAAAAAAAGTAAAGGTGAGTTACCATCTTCGGCAACATCGTGG<br>ACGAGGTGGCCTACAAAGGTGAGTTACGC               |
| 29 | 61986721<br>(Chr15) | 61986730<br>(Chr15) | TAAAAAAAAAGTAAAGGTGAGTTACCATCTTCGGCAACATCGTGG<br>ACGAGGTGGCCTACAAAGGTGAGTT                   |
| 30 | 61986726<br>(Chr15) | 61986726<br>(Chr15) | TCCAGCTGGTGCAGACCTACAACCAGCTGTTTCGAGG                                                        |
| 31 | 61986726<br>(Chr15) | 61986726<br>(Chr15) | TCCAGCTGGTGCAGACCTACAACCAGCTGTTTCGAGG                                                        |
| 32 | 61986717<br>(Chr15) | 61986729<br>(Chr15) | GCGTGGGAGGCCATCCTCCGAGGGGATGTACCCCGAGGACGGCG<br>CCCTGAAGGGCGAGATCAAGCAGAGGCTGAAGCTGAAGGACG   |
| 33 | 61986722<br>(Chr15) | 61986729<br>(Chr15) | GGAGGCCATCCTCCGAGGGGATGTACCCCGAGGACGGCGCCCTG<br>AAGGGCGAGATCAAGCAGAGGCTGAAGCTGAAGGACG        |
| 34 | 61986722<br>(Chr15) | 61986736<br>(Chr15) | GGAGGCCATCCTCCGAGGGGATGTACCCCGAGGACGGCGCCCTG<br>AAGGGCGAGATCAAGCAGAGGCTGCCGCTGAAGCACCTGTTATT |
| 35 | 61986662<br>(Chr15) | 61986772<br>(Chr15) | ATTCGGTCTATTGGTTAAAAAATGAGCTGATTTAACAAAAATTA<br>ACGCGAATTTT                                  |
| 36 | 61986720<br>(Chr15) | 61986728<br>(Chr15) | CCAGCAACGCGGCCTTTTTACGGTTCCTGGCCTTTTGCTGGCCTT<br>TTGCTCACATATAAGCGGTTACATATT                 |
| 37 | 61986720<br>(Chr15) | 61986728<br>(Chr15) | CCAGCAACGCGGCCTTTTTACGGTTCCTGGCCTTTTGCTGGCCTT<br>TTGCTCACATATAAGCGGTTACATATT                 |
| 38 | 61986724<br>(Chr15) | 61986942<br>(Chr15) | GTTTTTCGAGTTAGAAATAGCAAGTTAAAATAAGGCTAGTCCGTTT<br>TTAGT                                      |
| 39 | 61986725<br>(Chr15) | 61986726<br>(Chr15) | TGCCGACAAGAAGTACAGCATCGGCCTGGACA                                                             |
| 40 | 61986691<br>(Chr15) | 61986728<br>(Chr15) | GACCAAAGTGAAATACGTGACCGAGGGAATGAGAAAGTACT                                                    |
| 41 | 61986721<br>(Chr15) | 61986728<br>(Chr15) | GGCCTCTGCCGGCGAACTGCAGAAGGGAAACGAACTGGCCCTG<br>CCCTCCAAATATGTGAACTTCCTGTACTGTTTCATCCAGCTTGTT |
| 42 | 61986729<br>(Chr15) | 61986730<br>(Chr15) | GGAGGTCTATATAAGCAGAGCTGGTTTAGTGAACCGTCAGATCCG<br>CTAGCGC                                     |
| 43 | 61986682<br>(Chr15) | 62003290<br>(Chr15) | AAGTAGGAATCTGTTGCCGGATCAAGAGCTACCAACTCTTTTTCC<br>GAAGGTAAGTGGCTTCAGCAGAG                     |
| 44 | 61986717<br>(Chr15) | 61986729<br>(Chr15) | AGAACTCTGTAGCACCGCCTACATACCTCG                                                               |
| 45 | 61986717<br>(Chr15) | 61986729<br>(Chr15) | AGAACTCTGTAGCACCGCCTACATACCTCG                                                               |

## Supplementary Table S4 Comparison of PEM-Q with other in silico methods analyzing CRISPR-Cas editing repair outcomes

| In silico program | Sequencing method   | Eliminate PCR bias | Quantification                                          | Off target analysis | Indel analysis                             | Large deletion detection     | Translocation detection | Microhomology detection      | Vector integration analysis  | Editing efficiency analysis | Ref.              |
|-------------------|---------------------|--------------------|---------------------------------------------------------|---------------------|--------------------------------------------|------------------------------|-------------------------|------------------------------|------------------------------|-----------------------------|-------------------|
| TIDE              | Sanger sequencing   | –                  | Indel alignment                                         | –                   | Indel lengths and counts                   | Limited to templates' length | –                       | –                            | –                            | ✓                           | 47                |
| CRISPResso        | Targeted sequencing | –                  |                                                         | –                   |                                            |                              | –                       | –                            | –                            | ✓                           | 31                |
| ampliCan          | Targeted sequencing | –                  |                                                         | –                   |                                            |                              | –                       | –                            | –                            | ✓                           | 49                |
| CRIS.py           | Targeted sequencing | –                  |                                                         | –                   |                                            |                              | –                       | –                            | –                            | ✓                           | 48                |
| HTGTS             | HTGTS               | –                  | Translocation junction                                  | ✓                   | –                                          | Any length                   | ✓                       | ✓                            | –                            | –                           | 42                |
|                   | LAM-HTGTS           | ✓                  |                                                         | ✓                   |                                            |                              | ✓                       | –                            | –                            | 33                          |                   |
|                   | PEM-seq             | ✓                  |                                                         | ✓                   |                                            |                              | ✓                       | –                            | –                            | 28                          |                   |
| CAST-seq          | CAST-seq            | ✓                  | Linker with translocation junction                      | ✓                   | Use CRISPResso                             |                              | ✓                       | ✓                            | –                            | Use CRISPResso              | 27                |
| SuperQ            | PEM-seq             | ✓                  | Barcodes with indel alignment or translocation junction | ✓                   | Indel counts                               |                              | ✓                       | ✓                            | –                            | ✓                           | 28                |
| <b>PEM-Q</b>      | <b>PEM-seq</b>      | ✓                  |                                                         | ✓                   | <b>Indel lengths, sequences and counts</b> |                              | ✓                       | <b>Lengths and sequences</b> | <b>Lengths and sequences</b> | ✓                           | <b>This study</b> |

**Supplementary Table S5 Editing events and editing efficiency by PEM-seq**

| Sample           | Cell line | Deletion | Insertion | Translocation | Editing Efficiency (%) |
|------------------|-----------|----------|-----------|---------------|------------------------|
| Myc-WT-1         | CH12F3    | 96104    | 6151      | 3504          | 23.67                  |
| Myc-WT-2         | CH12F3    | 78895    | 4969      | 3248          | 25.00                  |
| Myc-WT-3         | CH12F3    | 102150   | 7408      | 3666          | 25.10                  |
| Myc-Lig4 -/- -1  | CH12F3    | 80179    | 8588      | 4299          | 25.30                  |
| Myc-Lig4 -/- -2  | CH12F3    | 70788    | 6802      | 3241          | 27.20                  |
| Myc-Lig4 -/- -3  | CH12F3    | 88315    | 9512      | 4992          | 25.10                  |
| Myc-Ku80 -/- -1  | CH12F3    | 68171    | 4341      | 3067          | 19.89                  |
| Myc-Ku80 -/- -2  | CH12F3    | 71441    | 5035      | 2927          | 17.94                  |
| Myc-Ku80 -/- -3  | CH12F3    | 58673    | 3827      | 2298          | 19.45                  |
| Myc-Parp1 -/- -1 | CH12F3    | 47086    | 3029      | 1939          | 13.16                  |
| Myc-Parp1 -/- -2 | CH12F3    | 45101    | 2795      | 2102          | 12.04                  |
| Myc-Parp1 -/- -3 | CH12F3    | 61609    | 3913      | 2854          | 12.76                  |
| Bcr-WT-1         | CH12F3    | 84458    | 7722      | 2848          | 12.89                  |
| Bcr-WT-2         | CH12F3    | 125864   | 12549     | 3717          | 17.90                  |
| Bcr-WT-3         | CH12F3    | 130172   | 12007     | 4024          | 16.74                  |
| Bcr-Lig4/- -1    | CH12F3    | 58747    | 6564      | 2305          | 12.77                  |
| Bcr-Lig4/- -2    | CH12F3    | 164842   | 16899     | 5141          | 28.56                  |
| Bcr-Lig4/- -3    | CH12F3    | 52361    | 5756      | 1769          | 15.82                  |
| Bcr-Ku80/- -1    | CH12F3    | 73445    | 6000      | 1863          | 11.39                  |
| Bcr-Ku80/- -2    | CH12F3    | 116415   | 8271      | 3082          | 17.51                  |
| Bcr-Ku80/- -3    | CH12F3    | 44326    | 3105      | 1280          | 9.60                   |
| Bcr-Parp1/- -1   | CH12F3    | 32888    | 2692      | 1696          | 7.63                   |
| Bcr-Parp1/- -2   | CH12F3    | 63068    | 5117      | 2520          | 10.80                  |
| Bcr-Parp1/- -3   | CH12F3    | 58344    | 4532      | 3122          | 10.36                  |
| MYC1-1           | HEK293T   | 91661    | 22162     | 4255          | 42.70                  |
| MYC1-2           | HEK293T   | 100493   | 24400     | 4759          | 43.02                  |
| MYC1-3           | HEK293T   | 145408   | 33929     | 7258          | 34.05                  |
| MYC2-1           | HEK293T   | 58215    | 26060     | 2809          | 21.55                  |
| MYC2-2           | HEK293T   | 94922    | 44884     | 4167          | 18.06                  |
| MYC2-3           | HEK293T   | 45435    | 20280     | 2046          | 23.86                  |
| Dnmt1-1          | HEK293T   | 98723    | 22235     | 4417          | 44.03                  |
| Dnmt1-2          | HEK293T   | 148520   | 33713     | 8582          | 39.55                  |
| Dnmt1-3          | HEK293T   | 162452   | 36548     | 7112          | 44.81                  |
| Dnmt2-1          | HEK293T   | 127000   | 53751     | 6282          | 46.83                  |
| Dnmt2-2          | HEK293T   | 141535   | 57826     | 6576          | 40.89                  |
| Dnmt2-3          | HEK293T   | 145725   | 57110     | 5378          | 39.82                  |
| P53              | mESC      | 49110    | 5794      | 1213          | 6.21                   |
| c-Myc            | mESC      | 49232    | 9739      | 1896          | 7.26                   |
| Hba              | mESC      | 22285    | 5607      | 948           | 17.32                  |
| Cep290           | mESC      | 19882    | 1704      | 862           | 4.95                   |
| SpCas9_RAG1A-1   | HEK293T   | 218058   | 41004     | 19494         | 33.54                  |
| SpCas9_RAG1A-2   | HEK293T   | 181393   | 32731     | 15818         | 29.48                  |
| SpCas9_RAG1A-3   | HEK293T   | 177486   | 30246     | 17389         | 31.93                  |
| eCas9_RAG1A-1    | HEK293T   | 123012   | 15987     | 5451          | 36.09                  |
| eCas9_RAG1A-2    | HEK293T   | 113242   | 14552     | 5258          | 29.20                  |
| eCas9_RAG1A-3    | HEK293T   | 69808    | 8651      | 3021          | 30.26                  |
| FeCas9_RAG1A-1   | HEK293T   | 40072    | 6148      | 2845          | 39.90                  |
| FeCas9_RAG1A-2   | HEK293T   | 61231    | 11964     | 4586          | 50.02                  |
| FeCas9_RAG1A-3   | HEK293T   | 31395    | 4995      | 2618          | 36.98                  |
| HF1_RAG1A-1      | HEK293T   | 95531    | 13704     | 4647          | 32.06                  |
| HF1_RAG1A-2      | HEK293T   | 142130   | 21126     | 6710          | 28.50                  |
| HF1_RAG1A-3      | HEK293T   | 111758   | 16438     | 4792          | 35.24                  |
